# Supplementary material
Source: Springer Nature journal article supplement (https://www.springermedizin.de/resource/supplementary/12984_2011_425_MOESM7_ESM.pdf/9605974)

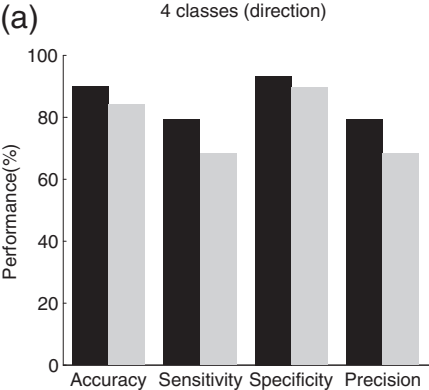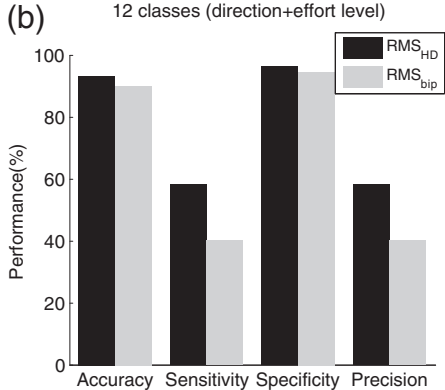

Supplement: MOESM7 [file 9605974]
